# Supplementary material for: Synthesis of a novel nano-rod-shaped hierarchical silicoaluminophosphate SAPO-11 molecular sieve with enhanced hydroisomerization of oleic acid to iso-alkanes
Source: Royal Society of Chemistry journal article supplement (doi:10.1039/c9ra06117g), 2019-01-01
Supplement: c9ra06117g1.pdf [file c9ra06117g1.pdf]

## Supporting Information

### **Synthesis of a novel nano-rod-shaped hierarchical silicoaluminophosphate SAPO-11 molecular sieve with enhanced hydroisomerization of oleic acid to iso-alkanes**

Lingmei Yang <sup>a,b,c</sup>, Huiwen Li <sup>a,b,c</sup>, Jun ying Fu <sup>a,b,c</sup>, Ming Li <sup>a,b,c</sup>, Changlin Miao <sup>a,b,c\*</sup>, Zhongming Wang

<sup>a,b,c</sup>, Pengmei Lv <sup>a,b,c\*</sup>, Zhenhong Yuan <sup>a,b,c</sup>

<sup>a</sup> Guangzhou Institute of Energy Conversion, Chinese Academy of Sciences, Guangzhou 510640, China

<sup>b</sup> CAS Key Laboratory of Renewable Energy, Guangzhou 510640, China

<sup>c</sup> Guangdong Provincial Key Laboratory of New and Renewable Energy Research and Development, Guangzhou 510640, China

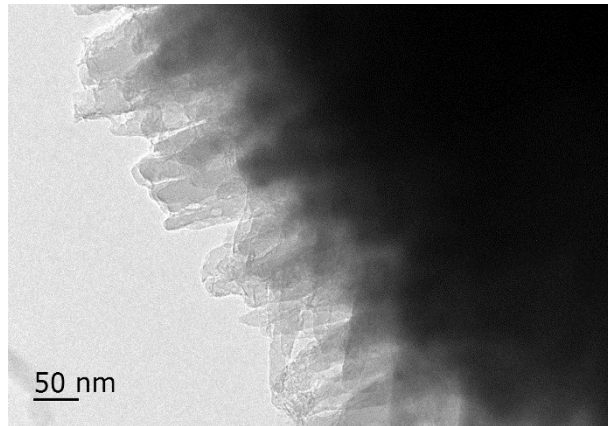

**Fig.S1.** The TEM image of the SAPO-11-A

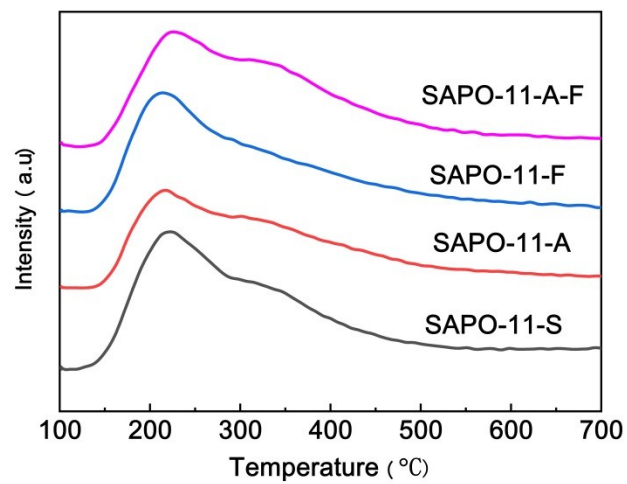

**Fig.S2.** NH<sub>3</sub>-TPD spectra for different SAPO-11 samples

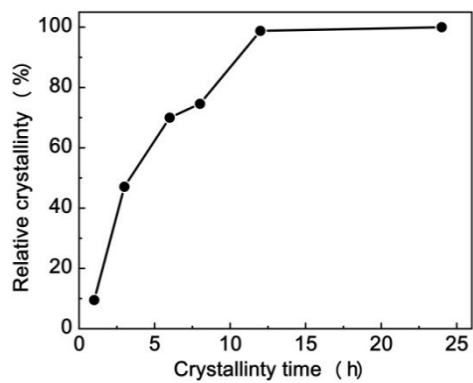

**Fig.S3.** Crystallization curves of SAPO-11-A-F obtained during different periods at 200 °C.

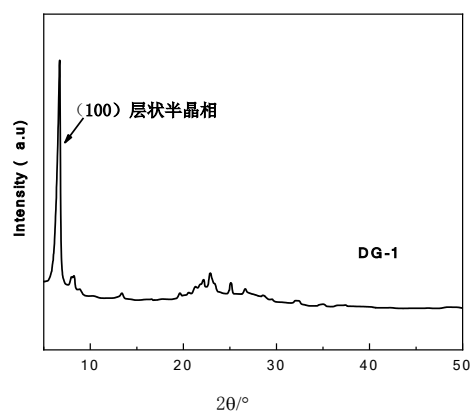

**Fig.S4.** The XRD spectra of the DG-1 sample

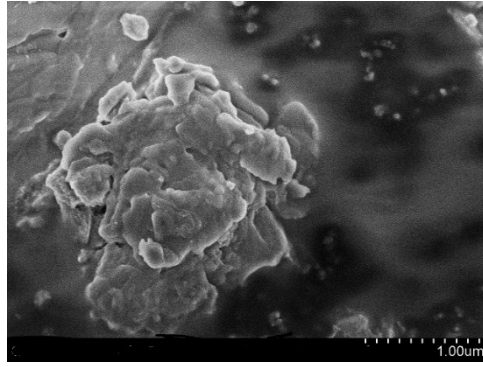

**Fig.S5.** The SEM image of the DG-1 sample

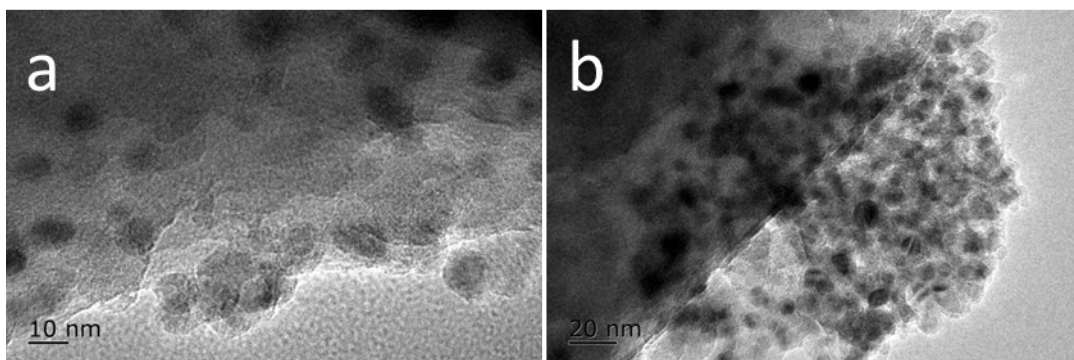

**Fig. S6.** TEM images of the different 7Ni/SAPO-11 catalysts. (a) 7Ni/SAPO-11-S  
(b) 7Ni/SAPO-11-A-F

**Tables S1.** Acid site densities of SAPO-11 catalysts by NH<sub>3</sub>-TPD curve

| Catalysts   | Peak temperature (°C) |     | Acid site content <sup>a</sup> (mmol/g) |
|-------------|-----------------------|-----|-----------------------------------------|
| SAPO-11-S   | 215                   | 317 | 0.90                                    |
| SAPO-11-A   | 215                   | 300 | 0.89                                    |
| SAPO-11-F   | 211                   | —   | 0.82                                    |
| SAPO-11-A-F | 221                   | 326 | 0.97                                    |

<sup>a</sup> Calculated from NH<sub>3</sub>-TPD curve.
